# Supplementary material
Source: PubMed Central journal article supplement (PMC4964978)
Supplement: NIHMS784538-supplement-Supplementary_material.pdf [file NIHMS784538-supplement-Supplementary_material.pdf]

## Whole Exome Sequencing to Estimate Alloreactivity Potential between Donors and Recipients in Stem Cell Transplantation

### Supplementary Materials

#### **Glossary**

Exome- part of the genome comprised of exons, coding for all the RNA

Common positions – chromosomal positions sequenced with high-quality read coverage in both the recipient and donor.

Single nucleotide polymorphisms – variation at a single position in a DNA sequence across individuals.

Synonymous mutation – a single base mutation in an exon of a protein-coding gene which does not alter the amino acid produced for that protein.

Nonsynonymous mutation – a single base mutation in an exon of a protein-coding gene which alters the amino acid produced for that protein.

Nonsynonymous, conservative mutation – a single base mutation in an exon of a protein-coding gene which alters the amino acid produced for that protein. However, the physiochemical properties of the amino acid remain the same; less likely to produce conformational change in the resulting oligopeptide.

Nonsynonymous, nonconservative mutation – a single base mutation in an exon of a protein-coding gene which alters the amino acid produced for that protein. The physiochemical properties of the amino acid are different; more likely to produce conformational change in the resulting oligopeptide.

Stop- a mutation resulting in either gain or loss of a stop codon

Read coverage – the average number of times any given nucleotide position is represented in a sequence read.

**Supplementary Table 1.** Donor-Recipient characteristics and patient outcomes observed in patients transplanted using ATG+450 cGy TBI.

| D-R Pair | D/R age | D/R sex | D/R race | Donor match | Diagnosis <sup>§</sup> | GVHD                | Relapse and Survival Status |
|----------|---------|---------|----------|-------------|------------------------|---------------------|-----------------------------|
| 2        | 59/64   | M/M     | AA/ AA   | MRD*        | MM                     | No                  | R, D                        |
| 3        | 32/44   | M/F     | M/C      | URD         | NHL                    | No                  | A                           |
| 4        | 52/46   | F/F     | AA/ AA   | MRD         | MM                     | No                  | A                           |
| 5        | 36/58   | M/M     | C/C      | URD         | CLL                    | Yes <sup>A</sup>    | D                           |
| 7        | 46/56   | M/F     | C/C      | URD         | NHL                    | No                  | A                           |
| 8        | 40/57   | M/M     | C/C      | URD         | PLL                    | Yes <sup>C</sup>    | D                           |
| 10       | 24/57   | M/F     | C/AA     | URD         | MM                     | Yes <sup>A, C</sup> | R, D                        |
| 16       | 65/62   | M/M     | C/C      | MRD         | PLL                    | No                  | R, D                        |
| 23       | 58/55   | F/F     | C/C      | MRD         | NHL                    | No                  | A                           |

AA indicates African American; M, Multiracial; C, Caucasian; MRD, matched related donor; URD, unrelated donor; \*, 7/8 HLA mismatch (A antigen); MM- Multiple myeloma; NHL- Non-Hodgkin Lymphoma; CLL- Chronic lymphocytic leukemia; PLL- Pro-lymphocytic leukemia; <sup>§</sup>- Disease status at SCT was complete remission in NHL and CLL patients and very good partial remission in MM; <sup>A</sup>, acute GVHD; <sup>C</sup>, chronic GVHD; R, relapsed; D, deceased; A, alive; NA, not available.

**Supplementary Table 2.** HLA type of the donor-recipient pairs

| D-R | HLA-A  | HLA-A  | HLA-B  | HLA-B  | HLA-C  | HLA-C | DRB1     | DRBI |
|-----|--------|--------|--------|--------|--------|-------|----------|------|
| 2   | 02:01* | 24:02  | 15:16  | 27:05  | 02:02  | 17:01 | 0101     | 0102 |
| 3   | 03:01  | 11:01  | 07:02  | 55:01  | 03:03  | 07:02 | 14:01/54 | 1501 |
| 4   | 23:01  | 30:02  | 15:03  | 440301 | 02:10  | 07:18 | 0301     | 0701 |
| 5   | 01:01  | 03:01  | 570101 | 07:02  | 07:02  | 07:01 | 0401     | 1501 |
| 7   | 01:01  | 02:01  | 44:02  | 55:01  | 03:03  | 05:01 | 0101     | 0401 |
| 8   | 01:01  | 24:02  | 07:02  | 55:01  | 03:03  | 07:02 | 1454     | 1501 |
| 10  | 01:01  | 03:01  | 080101 | 40:01  | 03:04  | 07:01 | 0301     | 1501 |
| 16  | 01:01  | 26:01  | 13:02  | 27:05  | 02:02  | 06:02 | 0701     | 1501 |
| 23  | 03:01  | 240201 | 07:02  | 570101 | 060201 | 07:02 | 0701     | 1501 |

\* Recipient HLA 23:01

**Supplementary Table 3.** Sample Statistics for the nine D-R pairs sequenced. The numbers in the parentheses denote percentage with respect to the number of HQ reads.

| <i>Sample ID</i> | <i>No. of reads (10<sup>7</sup>)</i> | <i>Total Bases (MB)</i> | <i>No. of HQ reads (10<sup>7</sup>)</i> | <i>Total Bases in HQ reads (MB)</i> | <i>No. of reads Aligned (10<sup>7</sup>)</i> | <i>No. of reads with duplicates (10<sup>7</sup>)</i> | <i>No. of unique reads (10<sup>7</sup>)</i> | <i>Total Bases in unique reads (MB)</i> | <i>X Coverage of the Exome</i> |
|------------------|--------------------------------------|-------------------------|-----------------------------------------|-------------------------------------|----------------------------------------------|------------------------------------------------------|---------------------------------------------|-----------------------------------------|--------------------------------|
| <b>10D</b>       | 9.31                                 | 9307                    | 7.53                                    | 7532                                | 6.94 (92%)                                   | 1.65 (22%)                                           | 5.29 (78%)                                  | 5295                                    | 84                             |
| <b>10R</b>       | 11.61                                | 1161                    | 9.30                                    | 9297                                | 8.47 (91%)                                   | 2.17 (23%)                                           | 6.29 (77%)                                  | 6291                                    | 100                            |
| <b>16D</b>       | 10.93                                | 1093                    | 8.92                                    | 8921                                | 8.14 (91%)                                   | 1.96 (22%)                                           | 6.18 (78%)                                  | 6181                                    | 98                             |
| <b>16R</b>       | 9.67                                 | 9668                    | 7.91                                    | 7911                                | 7.19 (91%)                                   | 1.62 (21%)                                           | 5.57 (79%)                                  | 5568                                    | 88                             |
| <b>23D</b>       | 10.15                                | 1015                    | 8.38                                    | 8379                                | 7.75 (93%)                                   | 1.85 (22%)                                           | 5.91 (78%)                                  | 5907                                    | 94                             |
| <b>23R</b>       | 10.97                                | 1097                    | 9.04                                    | 9042                                | 8.32 (92%)                                   | 2.14 (24%)                                           | 6.18 (76%)                                  | 6177                                    | 98                             |
| <b>2D</b>        | 10.43                                | 1043                    | 8.37                                    | 8369                                | 7.67 (92%)                                   | 1.93 (23%)                                           | 5.74 (77%)                                  | 5738                                    | 91                             |
| <b>2R</b>        | 10.95                                | 1094                    | 8.82                                    | 8822                                | 8.08 (92%)                                   | 2.09 (24%)                                           | 5.99 (76%)                                  | 5988                                    | 95                             |
| <b>3D</b>        | 5.82                                 | 5819                    | 4.96                                    | 4959                                | 4.80 (97%)                                   | 2.35 (47%)                                           | 2.45 (53%)                                  | 2446                                    | 39                             |
| <b>3R</b>        | 6.90                                 | 6901                    | 5.86                                    | 5860                                | 5.67 (97%)                                   | 2.92 (50%)                                           | 2.75 (50%)                                  | 2749                                    | 44                             |
| <b>4D</b>        | 15.17                                | 1517                    | 9.53                                    | 9535                                | 9.02 (95%)                                   | 5.39 (57%)                                           | 3.63 (43%)                                  | 3631                                    | 58                             |
| <b>4R</b>        | 20.13                                | 2013                    | 13.03                                   | 13034                               | 12.32 (94%)                                  | 7.93 (61%)                                           | 4.39 (39%)                                  | 4390                                    | 70                             |
| <b>5D</b>        | 5.98                                 | 5976                    | 5.01                                    | 5010                                | 4.82 (96%)                                   | 2.56 (51%)                                           | 2.26 (49%)                                  | 2261                                    | 36                             |
| <b>5R</b>        | 5.32                                 | 5323                    | 4.49                                    | 4492                                | 4.33 (96%)                                   | 2.18 (49%)                                           | 2.15 (52%)                                  | 2150                                    | 34                             |
| <b>7D</b>        | 3.92                                 | 3918                    | 3.32                                    | 3321                                | 3.20 (96%)                                   | 1.43 (43%)                                           | 1.77 (57%)                                  | 1766                                    | 28                             |
| <b>7R</b>        | 4.39                                 | 4385                    | 3.72                                    | 3717                                | 3.59 (97%)                                   | 1.68 (45%)                                           | 1.91 (55%)                                  | 1914                                    | 30                             |
| <b>8D</b>        | 6.40                                 | 6401                    | 5.36                                    | 5363                                | 5.17 (97%)                                   | 2.71 (51%)                                           | 2.47 (50%)                                  | 2465                                    | 39                             |
| <b>8R</b>        | 5.23                                 | 5229                    | 4.40                                    | 4396                                | 4.24 (97%)                                   | 2.12 (48%)                                           | 2.12 (52%)                                  | 2118                                    | 34                             |

**Supplementary table 4.** Median normalized SNP/Kbp for whole exome and for the 6p22.1-21.2 (MHC) locus in the graft versus host, host versus graft and direction independent SNPs. The Mann-Whitney U test was used to compare the degree of donor-recipient sequence difference between HLA matched related and unrelated D-R pairs.

|                                    | Exome |      |                 | MHC locus |      |                 |
|------------------------------------|-------|------|-----------------|-----------|------|-----------------|
|                                    | MRD   | URD  | <i>p</i> -value | MRD       | URD  | <i>p</i> -value |
| <i>Graft versus Host Direction</i> |       |      |                 |           |      |                 |
| Synonymous                         | 0.065 | 0.16 | 0.016           | 0.03      | 0.11 | 0.016           |
| Nonsynonymous                      | 0.06  | 0.15 | 0.016           | 0.07      | 0.17 | 0.063           |
| Conservative                       | 0.02  | 0.05 | 0.016           | 0.02      | 0.05 | 0.032           |
| Nonconservative                    | 0.04  | 0.1  | 0.016           | 0.05      | 0.11 | 0.063           |
| <i>Host versus Graft Direction</i> |       |      |                 |           |      |                 |
| Synonymous                         | 0.065 | 0.16 | 0.016           | 0.04      | 0.1  | 0.032           |
| Nonsynonymous                      | 0.065 | 0.15 | 0.016           | 0.04      | 0.15 | 0.032           |
| Conservative                       | 0.02  | 0.05 | 0.016           | 0.015     | 0.04 | 0.111           |
| Nonconservative                    | 0.045 | 0.1  | 0.016           | 0.025     | 0.09 | 0.032           |
| <i>Direction Independent</i>       |       |      |                 |           |      |                 |
| Synonymous                         | 0.115 | 0.19 | 0.016           | 0.04      | 0.13 | 0.032           |
| Nonsynonymous                      | 0.11  | 0.18 | 0.016           | 0.06      | 0.15 | 0.063           |
| Conservative                       | 0.035 | 0.06 | 0.016           | 0.025     | 0.05 | 0.063           |
| Nonconservative                    | 0.07  | 0.12 | 0.016           | 0.04      | 0.1  | 0.063           |

Matched related and unrelated donor SNP/Kbp distributions compared using the Mann-Whitney U Test.

MRD, matched related donor; URD, unrelated donor



**Supplementary table 5.** Total SNP counts / functional polymorphism for each D-R pair over the entire exome.

| <b>Graft vs. Host</b>        |                   |               |             |                |             |                         |                          |               |             |                |             |
|------------------------------|-------------------|---------------|-------------|----------------|-------------|-------------------------|--------------------------|---------------|-------------|----------------|-------------|
| <b>Pair</b>                  | <b>Raw Counts</b> |               |             |                |             | <b>Common Positions</b> | <b>Normalized Counts</b> |               |             |                |             |
|                              | <b>Syn</b>        | <b>Nonsyn</b> | <b>Cons</b> | <b>Noncons</b> | <b>Stop</b> |                         | <b>Syn</b>               | <b>Nonsyn</b> | <b>Cons</b> | <b>Noncons</b> | <b>Stop</b> |
| 5R-5D                        | 5497              | 5036          | 1737        | 3299           | 62          | 32992114                | 0.17                     | 0.15          | 0.05        | 0.10           | 0.00        |
| 8R-8D                        | 5497              | 5013          | 1754        | 3259           | 56          | 33461071                | 0.16                     | 0.15          | 0.05        | 0.10           | 0.00        |
| 10R-10D                      | 8218              | 7434          | 2534        | 4900           | 87          | 56634149                | 0.15                     | 0.13          | 0.04        | 0.09           | 0.00        |
| 3R-3D                        | 5575              | 5166          | 1775        | 3391           | 66          | 37333820                | 0.15                     | 0.14          | 0.05        | 0.09           | 0.00        |
| 7R-7D                        | 5485              | 5184          | 1779        | 3405           | 62          | 27267979                | 0.20                     | 0.19          | 0.07        | 0.12           | 0.00        |
| 2R-2D                        | 3989              | 3838          | 1370        | 2468           | 40          | 57112850                | 0.07                     | 0.07          | 0.02        | 0.04           | 0.00        |
| 4R-4D                        | 4099              | 3801          | 1338        | 2463           | 60          | 39689979                | 0.10                     | 0.10          | 0.03        | 0.06           | 0.00        |
| 16R-16D                      | 3111              | 2845          | 956         | 1889           | 32          | 57757544                | 0.05                     | 0.05          | 0.02        | 0.03           | 0.00        |
| 23R-23D                      | 3405              | 3151          | 1094        | 2057           | 38          | 57699413                | 0.06                     | 0.05          | 0.02        | 0.04           | 0.00        |
| <b>Host vs. Graft</b>        |                   |               |             |                |             |                         |                          |               |             |                |             |
| <b>Pair</b>                  | <b>Raw Counts</b> |               |             |                |             | <b>Common Positions</b> | <b>Normalized Counts</b> |               |             |                |             |
|                              | <b>Syn</b>        | <b>Nonsyn</b> | <b>Cons</b> | <b>Noncons</b> | <b>Stop</b> |                         | <b>Syn</b>               | <b>Nonsyn</b> | <b>Cons</b> | <b>Noncons</b> | <b>Stop</b> |
| 5R-5D                        | 5440              | 4935          | 1674        | 3261           | 61          | 32992114                | 0.16                     | 0.15          | 0.05        | 0.10           | 0.00        |
| 8R-8D                        | 5554              | 5126          | 1784        | 3342           | 57          | 33461071                | 0.17                     | 0.15          | 0.05        | 0.10           | 0.00        |
| 10R-10D                      | 6137              | 5676          | 1899        | 3777           | 65          | 56634149                | 0.11                     | 0.10          | 0.03        | 0.07           | 0.00        |
| 3R-3D                        | 5608              | 5264          | 1832        | 3432           | 52          | 37333820                | 0.15                     | 0.14          | 0.05        | 0.09           | 0.00        |
| 7R-7D                        | 5408              | 4888          | 1694        | 3194           | 48          | 27267979                | 0.20                     | 0.18          | 0.06        | 0.12           | 0.00        |
| 2R-2D                        | 4224              | 3905          | 1301        | 2604           | 51          | 57112850                | 0.07                     | 0.07          | 0.02        | 0.05           | 0.00        |
| 4R-4D                        | 3845              | 3540          | 1216        | 2324           | 49          | 39689979                | 0.10                     | 0.09          | 0.03        | 0.06           | 0.00        |
| 16R-16D                      | 3065              | 3003          | 1030        | 1973           | 49          | 57757544                | 0.05                     | 0.05          | 0.02        | 0.03           | 0.00        |
| 23R-23D                      | 3393              | 3187          | 1101        | 2086           | 55          | 57699413                | 0.06                     | 0.06          | 0.02        | 0.04           | 0.00        |
| <b>Direction Independent</b> |                   |               |             |                |             |                         |                          |               |             |                |             |
| <b>Pair</b>                  | <b>Raw Counts</b> |               |             |                |             | <b>Common Positions</b> | <b>Normalized Counts</b> |               |             |                |             |
|                              | <b>Syn</b>        | <b>Nonsyn</b> | <b>Cons</b> | <b>Noncons</b> | <b>Stop</b> |                         | <b>Syn</b>               | <b>Nonsyn</b> | <b>Cons</b> | <b>Noncons</b> | <b>Stop</b> |
| 5R-5D                        | 6121              | 6024          | 2095        | 3929           | 82          | 32992114                | 0.19                     | 0.18          | 0.06        | 0.12           | 0.00        |
| 8R-8D                        | 6125              | 6087          | 2145        | 3942           | 75          | 33461071                | 0.18                     | 0.18          | 0.06        | 0.12           | 0.00        |
| 10R-10D                      | 11789             | 10972         | 3764        | 7208           | 136         | 56634149                | 0.21                     | 0.19          | 0.07        | 0.13           | 0.00        |
| 3R-3D                        | 6772              | 6786          | 2365        | 4421           | 82          | 37333820                | 0.18                     | 0.18          | 0.06        | 0.12           | 0.00        |
| 7R-7D                        | 5151              | 5297          | 1827        | 3470           | 67          | 27267979                | 0.19                     | 0.19          | 0.07        | 0.13           | 0.00        |
| 2R-2D                        | 7191              | 6868          | 2406        | 4462           | 80          | 57112850                | 0.13                     | 0.12          | 0.04        | 0.08           | 0.00        |
| 4R-4D                        | 5099              | 5129          | 1822        | 3307           | 74          | 39689979                | 0.13                     | 0.13          | 0.05        | 0.08           | 0.00        |
| 16R-16D                      | 5465              | 5179          | 1771        | 3408           | 76          | 57757544                | 0.09                     | 0.09          | 0.03        | 0.06           | 0.00        |
| 23R-23D                      | 6019              | 5668          | 1993        | 3675           | 79          | 57699413                | 0.10                     | 0.10          | 0.03        | 0.06           | 0.00        |

Syn – synonymous SNPs; Nonsyn – nonsynonymous SNPs; Cons – nonsynonymous, conservative SNPs; Noncons – nonsynonymous, nonconservative SNPs; Stop – (stop gain/loss) SNPs.

**MUD SCT- 3, 5, 7, 8, 10. Gender mismatched donor- 3, 7, 10. African American recipients-2, 4 and 10. HLA-A mismatched donor-2**

**Supplementary table 6.** Total SNP counts / functional polymorphism for each D-R pair for the 6p22.1-21.2 (MHC) locus.

| Graft vs. Host        |            |        |      |         |      |                  |                   |        |      |         |      |
|-----------------------|------------|--------|------|---------|------|------------------|-------------------|--------|------|---------|------|
| Pair                  | Raw Counts |        |      |         |      | Common Positions | Normalized Counts |        |      |         |      |
|                       | Syn        | Nonsyn | Cons | Noncons | Stop |                  | Syn               | Nonsyn | Cons | Noncons | Stop |
| 5R-5D                 | 41         | 62     | 19   | 43      | 0    | 369261           | 0.11              | 0.17   | 0.05 | 0.12    | 0.00 |
| 8R-8D                 | 64         | 62     | 23   | 39      | 1    | 369450           | 0.17              | 0.17   | 0.06 | 0.11    | 0.00 |
| 10R-10D               | 38         | 67     | 25   | 42      | 1    | 564287           | 0.07              | 0.12   | 0.04 | 0.07    | 0.00 |
| 3R-3D                 | 28         | 26     | 8    | 18      | 0    | 397080           | 0.07              | 0.07   | 0.02 | 0.05    | 0.00 |
| 7R-7D                 | 72         | 95     | 32   | 63      | 1    | 305280           | 0.24              | 0.31   | 0.10 | 0.21    | 0.00 |
| 2R-2D                 | 22         | 48     | 13   | 35      | 0    | 563415           | 0.04              | 0.09   | 0.02 | 0.06    | 0.00 |
| 4R-4D                 | 17         | 34     | 7    | 27      | 0    | 396481           | 0.04              | 0.09   | 0.02 | 0.07    | 0.00 |
| 16R-16D               | 9          | 30     | 9    | 21      | 1    | 573016           | 0.02              | 0.05   | 0.02 | 0.04    | 0.00 |
| 23R-23D               | 13         | 20     | 6    | 14      | 0    | 573415           | 0.02              | 0.03   | 0.01 | 0.02    | 0.00 |
| Host vs. Graft        |            |        |      |         |      |                  |                   |        |      |         |      |
| Pair                  | Raw Counts |        |      |         |      | Common Positions | Normalized Counts |        |      |         |      |
|                       | Syn        | Nonsyn | Cons | Noncons | Stop |                  | Syn               | Nonsyn | Cons | Noncons | Stop |
| 5R-5D                 | 37         | 56     | 16   | 40      | 0    | 369261           | 0.10              | 0.15   | 0.04 | 0.11    | 0.00 |
| 8R-8D                 | 34         | 54     | 19   | 35      | 0    | 369450           | 0.09              | 0.15   | 0.05 | 0.09    | 0.00 |
| 10R-10D               | 30         | 33     | 8    | 25      | 0    | 564287           | 0.05              | 0.06   | 0.01 | 0.04    | 0.00 |
| 3R-3D                 | 50         | 45     | 17   | 28      | 0    | 397080           | 0.13              | 0.11   | 0.04 | 0.07    | 0.00 |
| 7R-7D                 | 55         | 96     | 26   | 70      | 1    | 305280           | 0.18              | 0.31   | 0.09 | 0.23    | 0.00 |
| 2R-2D                 | 46         | 49     | 15   | 34      | 1    | 563415           | 0.08              | 0.09   | 0.03 | 0.06    | 0.00 |
| 4R-4D                 | 18         | 17     | 5    | 12      | 0    | 396481           | 0.05              | 0.04   | 0.01 | 0.03    | 0.00 |
| 16R-16D               | 16         | 25     | 11   | 14      | 0    | 573016           | 0.03              | 0.04   | 0.02 | 0.02    | 0.00 |
| 23R-23D               | 11         | 15     | 4    | 11      | 0    | 573415           | 0.02              | 0.03   | 0.01 | 0.02    | 0.00 |
| Direction Independent |            |        |      |         |      |                  |                   |        |      |         |      |
| Pair                  | Raw Counts |        |      |         |      | Common Positions | Normalized Counts |        |      |         |      |
|                       | Syn        | Nonsyn | Cons | Noncons | Stop |                  | Syn               | Nonsyn | Cons | Noncons | Stop |
| 5R-5D                 | 48         | 80     | 26   | 54      | 0    | 369261           | 0.13              | 0.22   | 0.07 | 0.15    | 0.00 |
| 8R-8D                 | 28         | 31     | 12   | 19      | 0    | 369450           | 0.08              | 0.08   | 0.03 | 0.05    | 0.00 |
| 10R-10D               | 60         | 86     | 29   | 57      | 0    | 564287           | 0.11              | 0.15   | 0.05 | 0.10    | 0.00 |
| 3R-3D                 | 58         | 54     | 18   | 36      | 0    | 397080           | 0.15              | 0.14   | 0.05 | 0.09    | 0.00 |
| 7R-7D                 | 82         | 111    | 36   | 75      | 1    | 305280           | 0.27              | 0.36   | 0.12 | 0.25    | 0.00 |
| 2R-2D                 | 61         | 83     | 26   | 57      | 1    | 563415           | 0.11              | 0.15   | 0.05 | 0.10    | 0.00 |
| 4R-4D                 | 15         | 24     | 7    | 17      | 0    | 396481           | 0.04              | 0.06   | 0.02 | 0.04    | 0.00 |
| 16R-16D               | 20         | 36     | 15   | 21      | 0    | 573016           | 0.03              | 0.06   | 0.03 | 0.04    | 0.00 |
| 23R-23D               | 21         | 25     | 7    | 18      | 0    | 573415           | 0.04              | 0.04   | 0.01 | 0.03    | 0.00 |

Syn – synonymous SNPs; Nonsyn – nonsynonymous SNPs; Cons – nonsynonymous, conservative SNPs; Noncons – nonsynonymous, nonconservative SNPs; Stop – (stop gain/loss) SNPs.

**Figure S1.** WES to quantify SNPs between SCT D-R pairs. Whole exome demonstrates extensive variation between donors and recipients independent of HLA matching. **Actual D-R pairs (green bars and red \*)** depict exome variation between recipient and their actual HLA-matched donors, while **simulated pairs (blue bars)** consist of the recipients from each pair compared with a donor from other D-R pairs. Y axis depicts SNP in the pairs. X-axis depicts the actual and simulated pairs. D-R pairs 3, 5, 7, 8 and 10 underwent MUD SCT (solid line), and 2, 4, 16 and 23 MRD SCT (dashed line).

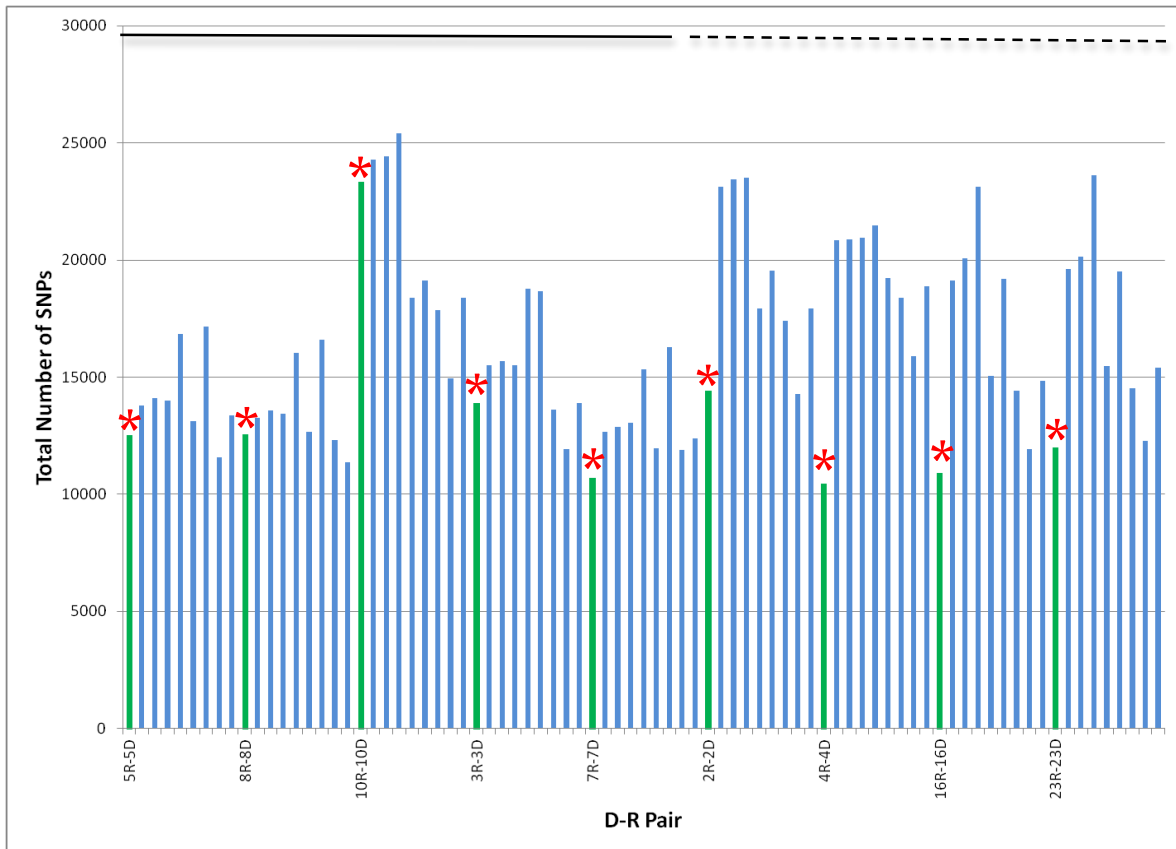

Figure S2. (A) Alloreactivity potential vectors depicting conservative vs. nonconservative, nonsynonymous nucleotide variation in D-R pairs across the whole exome in the host versus graft direction, variants absent in the recipient and present in the donor. (B) Nonsynonymous SNPs in the graft versus host direction mapped on to individual chromosomes in all the D-R pairs, demonstrate the genomic location of polymorphisms along the length of the chromosome in each D-R pair. All nine D-R pairs depicted on the y-axis for each chromosome; SNP coordinates (location) along the length of each chromosome depicted on the x-axis. (C) Nonsynonymous SNPs in the host versus graft direction mapped onto each chromosomes (data presented in Figure 1D)

A.

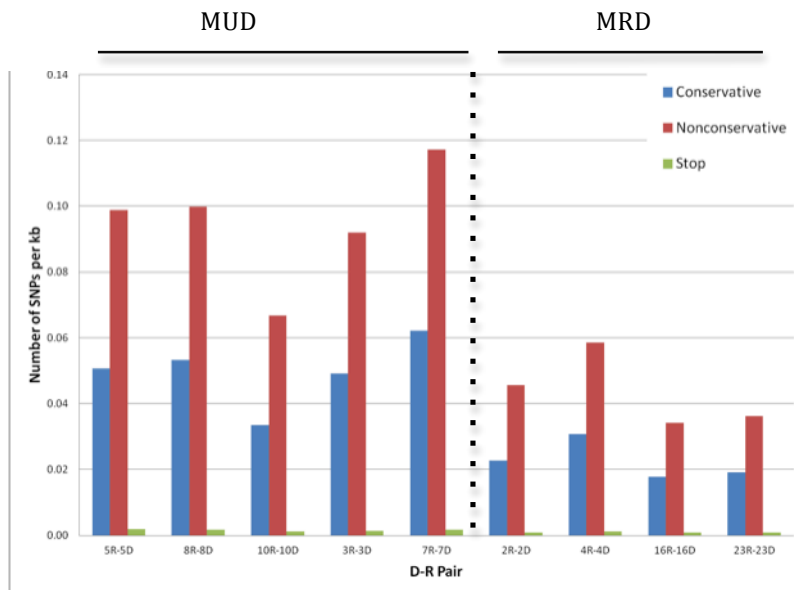

B.

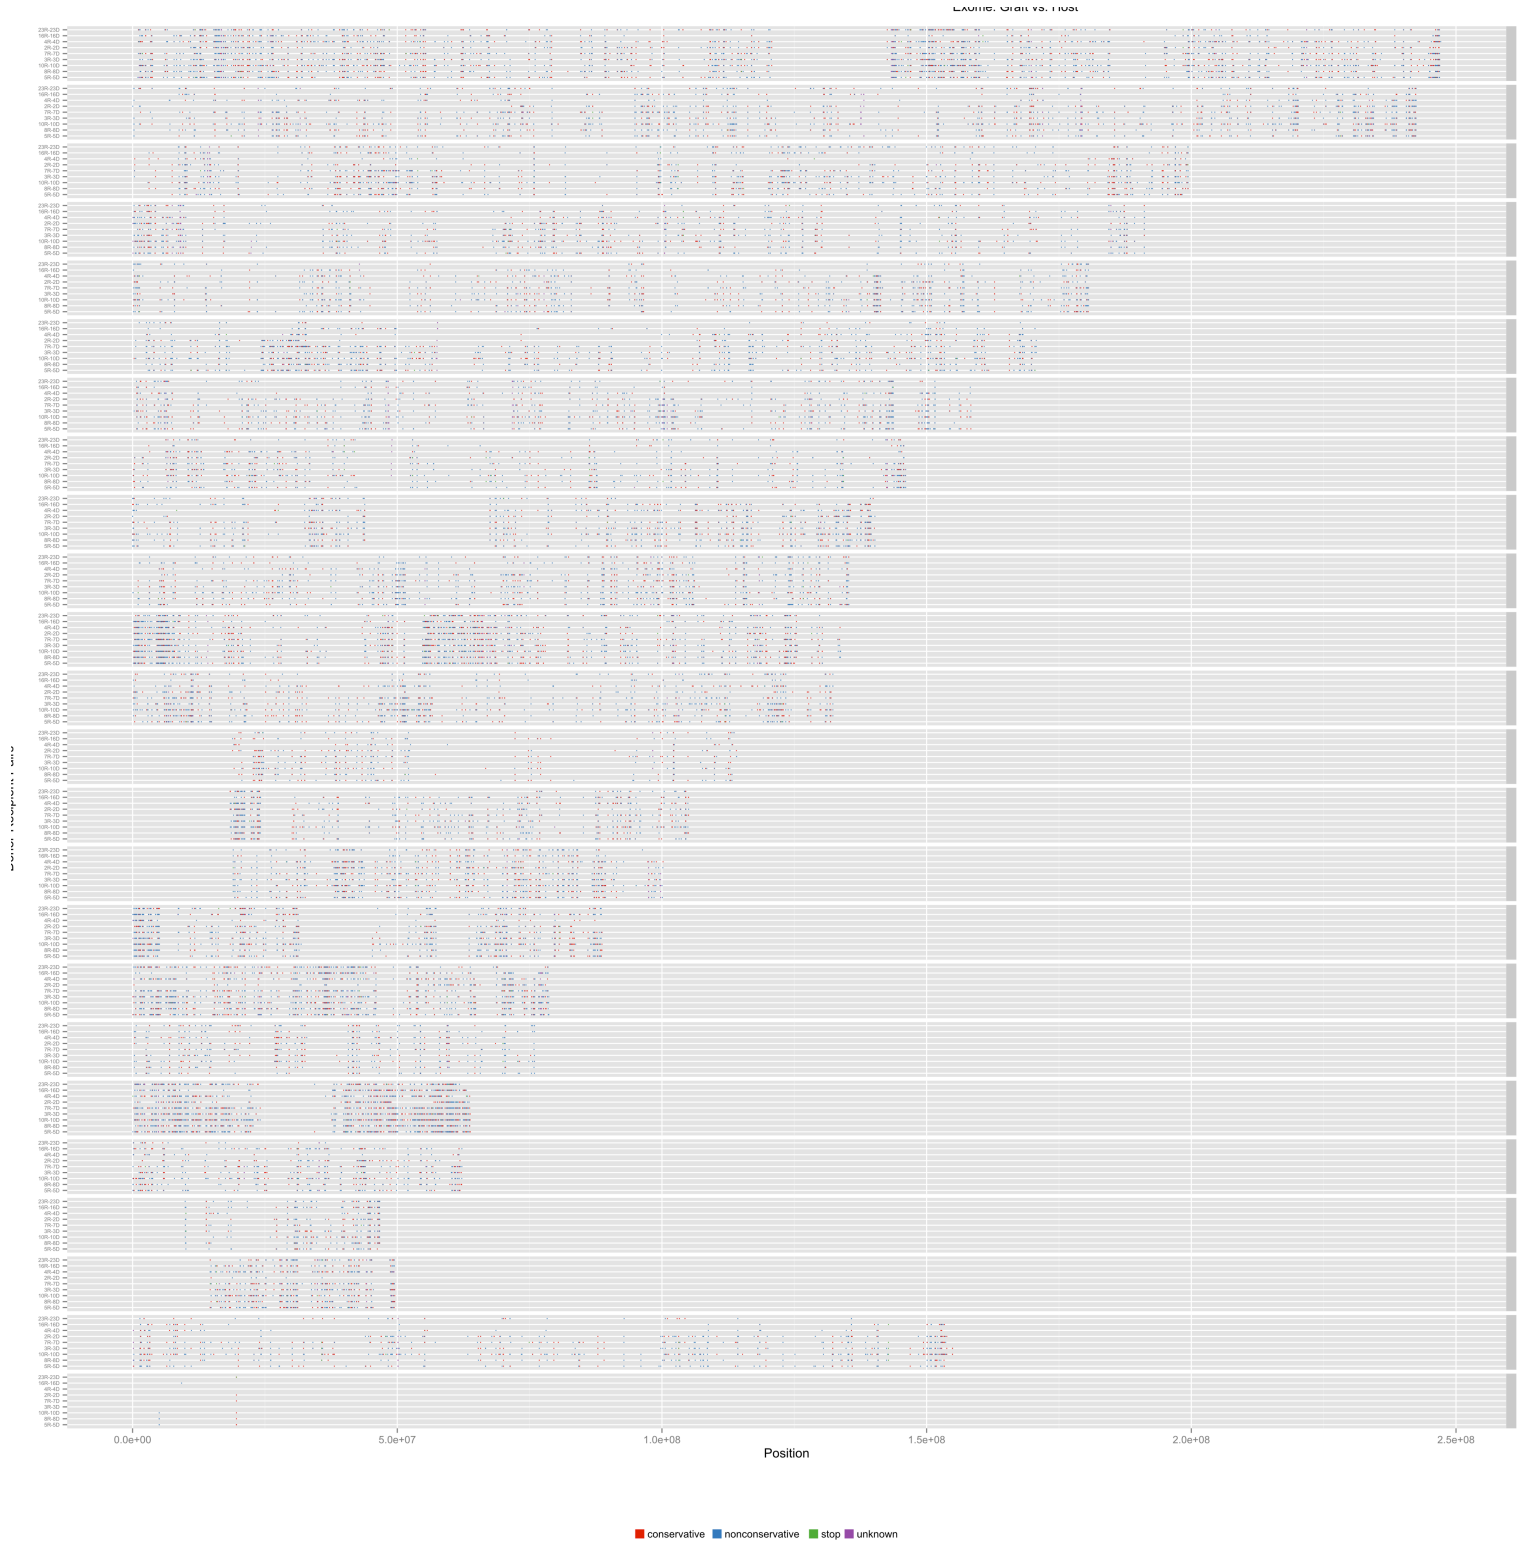

C.
